# Supplementary material for: Brain-wide reconstruction of inhibitory circuits after traumatic brain injury
Source: PubMed Central journal article supplement (PMC9197933; doi:10.1038/s41467-022-31072-2), 2022-06-14
Supplement: 41467_2022_31072_MOESM2_ESM.pdf [file 41467_2022_31072_MOESM2_ESM.pdf]

## Description of Additional Supplementary Files

**Supplementary Movie 1:** Input neurons to hilar SST interneurons in an uninjured mouse brain.

**Supplementary Movie 2:** Input neurons to hilar SST interneurons in an injured mouse brain.

**Supplementary Movie 3:** Input neurons to PFC SST interneurons in an uninjured mouse brain.

**Supplementary Movie 4:** Input neurons to PFC SST interneurons in an injured mouse brain.

**Supplementary Movie 5:** Input neurons to transplanted SST interneurons in an injured mouse brain.

**Supplementary Data 1:** Quantification of immunostaining experiments.

**Supplementary Data 2:** ARA nomenclature.

**Supplementary Data 3:** AP distribution of input to hilar SST interneurons.

**Supplementary Data 4:** Proportion of input to hilar SST interneurons.

**Supplementary Data 5:** Convergence index (CI) of input to hilar SST interneurons.

**Supplementary Data 6:** DV distribution of starter cells in PFC.

**Supplementary Data 7:** AP and ML distribution of input to PFC SST interneurons.

**Supplementary Data 8:** Proportion of input to PFC SST interneurons.

**Supplementary Data 9:** Convergence index (CI) of input to PFC SST interneurons.
